# Supplementary material
Source: PubMed Central journal article supplement (PMC3057825)
Supplement: supp_M110.206722_jbc.M110.206722-1.pdf [file supp_M110.206722_jbc.M110.206722-1.pdf]

**Supplemental Table 1** The chemical shifts ( $\delta$ ) in ppm of synthetic disaccharide substrates assigned by  $^1\text{H}$ -NMR spectroscopy.

| Sugars                                                            | H-1           | H-2       | H-3       | H-4       | H-5       | H-6a (b)                 | H-1'          | H-2' | H-3'      | H-4'      | H-5'      | H-6'a (b)                |
|-------------------------------------------------------------------|---------------|-----------|-----------|-----------|-----------|--------------------------|---------------|------|-----------|-----------|-----------|--------------------------|
| GlcNAc $\alpha$ 1,4Gal $\beta$ 1pMP                               | 4.82 (7.6 Hz) | 3.84-3.70 | 3.67-3.62 | 4.03      | 3.84-3.70 | 3.84-3.70<br>(3.67-3.62) | 4.93 (4.1 Hz) | 3.95 | 3.84-3.70 | 3.45      | 4.28      | 3.82<br>(3.84-3.70)      |
| GlcNAc $\alpha$ 1,6Gal $\beta$ 1pMP                               | 4.94 (6.9 Hz) | 3.76      | 3.71-3.75 | 3.95-3.99 | 3.95-3.99 | 3.86 (3.69)              | 4.87 (3.4 Hz) | 3.89 | 3.68      | 3.45      | 3.60-3.66 | 3.71-3.75<br>(3.60-3.66) |
| Hexa- <i>O</i> -Acetylated<br>GlcNAc $\alpha$ 1,2Gal $\beta$ 1pMP | 4.93 (7.6 Hz) | 4.03-4.16 | 5.07      | 5.42      | 4.00      | 4.23<br>(4.03-4.16)      | 5.29 (3.4 Hz) | 4.38 | 5.13-5.20 | 5.13-5.20 | 4.03-4.16 | 4.19<br>(4.03-4.16)      |
| Hexa- <i>O</i> -Acetylated<br>GlcNAc $\alpha$ 1,3Gal $\beta$ 1pMP | 4.84 (7.6 Hz) | 5.41      | 3.88      | 5.43      | 3.92-3.96 | 4.11-4.26                | 5.01 (3.4 Hz) | 5.41 | 5.03      | 5.15      | 3.92-3.96 | 4.11-4.26                |
| GlcNAc $\alpha$ 1,4GlcA $\beta$ 1pMP                              | 4.86 (8.2 Hz) | 3.43      | 3.60-3.80 | 3.72      | 3.91      | -                        | 5.26 (4.1 Hz) | 3.75 | 3.56      | 3.37      | 3.50      | 3.60-3.80<br>(3.60-3.80) |

**Supplemental Table 2** The chemical shifts ( $\delta$ ) in ppm of synthetic disaccharide substrates assigned by  $^{13}\text{C}$ -NMR spectroscopy.

| Sugars                                                            | C-1    | C-2   | C-3   | C-4   | C-5   | C-6    | C-1'   | C-2'  | C-3'  | C-4'  | C-5'  | C-6'  |
|-------------------------------------------------------------------|--------|-------|-------|-------|-------|--------|--------|-------|-------|-------|-------|-------|
| GlcNAc $\alpha$ 1,4Gal $\beta$ 1pMP                               | 104.03 | 72.45 | 74.35 | 77.71 | 76.86 | 60.76  | 100.32 | 55.56 | 72.65 | 72.04 | 73.69 | 62.33 |
| GlcNAc $\alpha$ 1,6Gal $\beta$ 1pMP                               | 102.31 | 71.28 | 73.32 | 69.55 | 73.84 | 67.31  | 97.45  | 54.31 | 71.92 | 70.58 | 72.70 | 61.15 |
| Hexa- <i>O</i> -Acetylated<br>GlcNAc $\alpha$ 1,2Gal $\beta$ 1pMP | 102.03 | 75.36 | 71.89 | 67.06 | 70.96 | 61.18  | 99.10  | 51.97 | 70.83 | 67.71 | 68.86 | 61.60 |
| Hexa- <i>O</i> -Acetylated<br>GlcNAc $\alpha$ 1,3Gal $\beta$ 1pMP | 100.96 | 70.40 | 77.83 | 66.60 | 68.91 | 61.11  | 98.85  | 51.64 | 70.03 | 67.78 | 70.73 | 61.25 |
| GlcNAc $\alpha$ 1,4GlcA $\beta$ 1pMP                              | 101.28 | 73.12 | 76.00 | 76.12 | 75.34 | 174.43 | 97.40  | 53.61 | 70.59 | 69.46 | 72.16 | 59.95 |
